# Supplementary material
Source: publisher figshare collection journal article supplement (https://gsajournals.figshare.com/ndownloader/files/18736355)
Supplement: Supplementary file 1 [file 18736355]

## Sheet: All Genes
ABCD2
ACAD8
ACAT1
ACBD3
ACSL1
ACVR2A
ADAM23
ADCY5
ADCYAP1
ADD3
ADGRL2
AFAP1
AGA
AKAP9
ALCAM
AMBP
ANGPT1
ANKH
ANKRD26
ANKS1B
ANO5
AP1S2
APCDD1
API5
APOB
APOD
APOV1
AQP2
ARC
ARGLU1
ARHGAP15
ARHGEF3
ARL6
ARL8BL
ARNTL2
ARSH
ASAH1
ASCC3
ATF7IP
ATG7
ATP12A
ATP1B3
AvBD10
AVPR1A
B3GAT1
B3GAT1L
B3GAT2
B3GNT2
BAIAP2L1
BARX1
BASP1
BCHE
BCL11A
BCL2
BDH1A
BDKRB2
BIN1
BMP5
BMPR1A
BMPR2
BRAP
BRD1
BRD7
BRE
BRINP1
BTG1
BUB3
C10H15ORF59
C15H12orf49
C18H17ORF67
C1D
C1GALT1
C1H21ORF59
C1H21ORF91
C3H6orf120
C5H11orf58
C5H11orf74
C7H2ORF69
CACNA1D
CACNB4
CACUL1
CAMK2D
CAPZA2
CARD11
CBLN2
CCKAR
CCNE1
CCT5
CD276
CDC27
CDH10
CDH11
CDH13
CDH6
CDH8
CEBPA
CEBPZ
CELF1
CENPF
CENPP
CENPX
CEP112
CH25H
CHAF1B
CHD7
CHID1
CHM
CHMP2B
CHRDL1
CHRM3
CHRND
CHST10
CHUNK-1
CMC2
CNDP2
CNGA1
CNOT7
CNTN5
COL22A1
COL9A1
COLEC11
COMMD8
COPS2
COX10
COX17
COX6C
COX7A2L
CPNE8
CPZ
CRELD2
CRIM1
CRISPLD1
CST3
CST7
CTNNA3
CWC15
CXCL12
CXCL13
CXCR4
CYB5A
CYP19A1
CYP24A1
CYP2C23a
CYP2C45
CYP4V2
CYR61
DACH2
DAPP1
DBR1
DCLK1
DCN
DCT
DCX
DDX27
DENND6A
DFFB
DGCR6L
DHCR7
DHX15
DIAPH2
DIEXF
DLK1
DLX6
DMD
DMTF1
DPP4
DPYSL4
DTNBP1
DYNC1I2
DYNLRB2
DYRK1A
ECHDC1
EDNRA
EFNB2
EGFL6
EIF4H
ELF1
ELMO1
EN2
ENTPD1
ENTPD2
ENTPD8
EOMES
EPAS1
EPB42
EPHA3
EPHA4
EPHA7
EPHB2
EPHB6
EPHX2
ERICH1
ERNI
ESR1
ESRRG
ETFDH
EVL
EWSR1
EXOSC10
EYA2
FAAP24
FAM102A
FAM129A
FAM206A
FAM45A
FAM53A
FAS
FAT3
FBLN1
FDX1
FGF13
FGF14
FGF7
FGFR3
FHIT
FOXD2
FOXL2
FOXO1
FOXP2
FRZB
FSHB
FSHR
FZD1
FZD5
G2E3
GABRA1
GABRB2
GABRG2
GALNT1
GALNT18
GALNT6
GCC1
GCG
GDF2
GFRA1
GHITM
GJA1
GLCCI1
GLI2
GLP1R
GLRX5
GNAL
GNPTG
GORASP2
GPAT3
GPATCH2
GPER1
GPR137B
GPR89B
GRB10
GRIA4
GRPEL1
GSTK1
GSTO1
GTDC1
GTF2A1
GTPBP4
GYPC
H2AFY
H2AFZ
H3F3C
HABP2
HACE1
HBA1
HCRTR2
HDAC2
HDAC9
HESX1
HGF
HIF1A
HIKESHI
HMGA1
HMGB1
HMGB2
HMX1
HNMT
HOOK1
HSBP1
HSF2
HSPA13
HSPA9
HSPH1
HTR2A
HYAL6
IDH3A
IFIH1
IFT81
IGF1
IGF2R
IGFBP1
IL17RA
IL5RA
INHBB
INSIG2
INTS9
INVS
IRX1
ITPK1
JMJD4
JUN
KBTBD4
KCNA4
KCND2
KCNG2
KIT
KLF7
KLHL14
KRR1
KTN1
KY
LAMA1
LBR
LCORL
LCP1
LCP2
LGI2
LIG4
LMBR1
LMBRD1
LMNB2
LMO4
LMX1B
LOC395381
LOC421419
LOC422426
LOC771456
LONP2
LPP
LRPAP1
LTBP1
LYRM2
MAB21L2
MAEA
MAF
MAFK
MALRD1
MAPRE2
MAPT
MARCO
MATR3
MBNL2
MBOAT1
MBP
MC2R
MCFD2
MCM9
MCPH1
MED30
MED6
MEIS1
MEIS2
METTL14
METTL15
METTL21A
MGLL
MGST1
MIR125B2
MIR128-2
MIR135B
MIR1467-2
MIR146A
MIR147-1
MIR153-2
MIR155HG
MIR1568
MIR1607
MIR1610
MIR1613
MIR1619
MIR1620
MIR1624
MIR1641
MIR1646
MIR1651
MIR1653
MIR1659
MIR1660
MIR1664
MIR1685
MIR1695
MIR17
MIR1708
MIR1709
MIR1730
MIR1734
MIR1741
MIR1744
MIR1769
MIR1770
MIR1775
MIR1781
MIR1789
MIR1791
MIR1796
MIR1803
MIR1806
MIR1809
MIR1813-1
MIR1815
MIR1816
MIR202
MIR205
MIR302B
MIR30A
MIR30D
MIR32
MIR3524B
MIR3530
MIR3539
MIR383
MIR466
MIR6073
MIR6545
MIR6559
MIR6561
MIR6562
MIR6570
MIR6572
MIR6574
MIR6581
MIR6591
MIR6595
MIR6599
MIR6605
MIR6609
MIR6622
MIR6631
MIR6654
MIR6677
MIR6678
MIR6696
MIR6704
MIR6707
MIR6708
MIR6755
MIR7444
MIR7459
MIR7463
MIR7465
MIR7468
MIR757
MIR762
MIR92A1
MIRLET7I
MLN
MMP16
MPPE1
MRAP2
MRPL28
MRPL44
MSX1
MTMR2
MTNR1A
MXI1
MYL2
MYLIP
MYO5A
MYO6
MYOCD
MYOD1
MYOZ2
N4BP1
NBEA
NDC80
NDEL1
NDUFAF5
NDUFC2
NEBL
NEUROD1
NEUROG1
NEUROG2
NFASC
NFKB1
NFKBIZ
NGLY1
NINJ1
NKAIN2
NKX6-2
NLGN4L
NMUR1
NOC4L
NPTN
NPY1R
NR0B1
NR2E1
NRXN1
NSUN2
NUBP1
NUDT5
OAT
OLFM4
OLIG2
OPCML
OPN1MSW
OPN5L2
OPTN
OSR2
OSTC
OSTM1
OTOR
OTX2
PAH
PALD1
PAPD7
PARD3
PARD6B
PARP4
PAX3
PAX9
PBK
PCDH10
PDCD10
PDCD5
PDCL3
PDE5A
PDE6C
PDGFA
PDGFD
PDGFRA
PDHB
PDIA4
PDK3
PDLIM3
PER2
PEX2
PFKP
PGK1
PHF20L1
PHYHIPL
PI15
PIK3AP1
PIK3CB
PITX2
PLA2G4A
PLAU
PLCZ1
POLR2B
POLR2L
POPDC3
POSTN
POT1
POU1F1
PPM1B
PPP1R9B
PPP4R2
PRELID3A
PRELID3B
PREP
PRKAB1
PRKD1
PRL
PRR5
PSMC1
PSMD14
PSMD9
PTGR2
PTN
PTPN11
PTPN2
PTPRG
PTPRO
PTPRU
QKI
RAB11A
RAB23
RAB35
RABL2L
RAC1
RAD52
RALGAPA1
RALYL
RAMP3
RANGAP1
RAP1GDS1
RASA2
RBM12B
RBP2
RCOR3
REEP3
RELL1
RET
REV1
RFC3
RFTN2
RGL1
RHAG
RHOJ
RIMBP2
RIPK2
RMDN1
RMI2
ROM1
RPAP3
RPL22
RPL7L1
RPRD1A
RPS27L
RPS3
RPS3A
RSPO2
RUNDC3B
RUNX1T1
RUVBL1
RYR3
SALL3
SALL4
SAMM50
SATB2
SBF2
SBSPON
SCN2A
SEC24B
SEM1
SEMA3C
SEMA3D
SEMA3E
SEPT7
SERPINE2
SF3A1
SF3B5
SH3BP2
SH3GLB1
SHH
SIPA1L1
SIX1
SIX2
SLA
SLC10A2
SLC10A7
SLC16A7
SLC24A1
SLC25A13
SLC25A26
SLC25A36
SLC25A4
SLC35G2
SLC46A3
SLC7A1
SLIT2
SLIT3
SLN
SMPX
SMS
SNCG
SNX16
SNX20
SOCS5
SOCS6
SOX11
SOX14
SOX4
SP3
SP5
SPATA4
SPCS3
SPERT
SRGAP3
SRI
SSB
SSBP1
SSTR1
ST7
STAT4
STAU1
STK17B
STK3
STRAP
STT3B
STX17
STX18
STX2
SUCLA2
SULT
SUPT20H
SUPT3H
SYNPR
SZRD1
T
TACC3
TAF13
TAF3
TASP1
TBC1D15
TBC1D22A
TBCD
TBX18
TBX3
TCF7L2
TDRD3
TEAD1
TEF
TENM3
TERF1
TESC
TFAP2D
TGFB2
TGFBR1
TGFBR2
THADA
THBS2
THOC7
TINAG
TLR3
TLR4
TM9SF2L
TMEM164
TMEM17
TMEM30A
TMEM5
TMEM70
TMSB4X
TNC
TNIP2
TOLLIP
TPD52L1
TPH1
TPRA1
TRABD
TSKU
TSN
TSNAX
TSPAN12
TSPAN14
TSPAN8
TTC27
TTC7A
TTLL12
TWSG1
TXNRD3
UBA2
UBAC2
UBE2I
UBIAD1
UBL7
UBXN2A
UFM1
UGT8
UNC5C
USP15
USP40
USP7
USPL1
VEGFD
VIP
VIPR2
VMO1
VPS50
VTI1A
WASHC1
WDCP
WFDC1
WISP1
WNT11
WNT4
WNT5A
WNT7B
WNT9A
XBP1
YIPF4
YIPF7
YTHDF3
YY2
ZAR1L
ZBTB17
ZBTB34
ZC3H14
ZC3H15
ZDHHC13
ZDHHC17
ZDHHC8
ZEB2
ZFP36L2
ZFP64
ZNF277
ZNF326
ZNF622
ZNF800
ZP4
ZPBP

## Sheet: Biological Process
Analysis Type:	PANTHER Overrepresentation Test (Released 20181113)
Annotation Version and Release Date:	GO Ontology database Released 2018-12-01
Analyzed List:	upload_1 (Gallus gallus)
Reference List:	Gallus gallus (all genes in database)
Test Type:	FISHER
Correction:	BONFERRONI
Bonferroni count:	6611
GO biological process complete	Gallus gallus - REFLIST (19122)	Gene Number in Uploaded List	Expected value	upload_1 (over/under)	Fold Enrichment	P-value	Genes in Uploaded List (Only show top 30)
genitalia development (GO:0048806)	38	11	1.53	+	7.17	0.014	PTPN11 NEUROG1 WNT5A SHH TBX3 CYP19A1 BMP5 PDGFRA TBX3 CHD7 ESR1
ephrin receptor signaling pathway (GO:0048013)	38	11	1.53	+	7.17	0.014	EPHA4 PTPN11 EPHB2 ELF1 EFNB2 EPHA3 EPHB2 EPHA4 EPHA3 EPHA7 EPHB6
female sex differentiation (GO:0046660)	72	19	2.91	+	6.54	1.07e-05	DACH2 WNT5A FSHB TBX3 CYP19A1 FOXL2 PDGFRA FSHR WNT4 SLIT2 TGFB2 FSHR TBX3 BCL2 SLIT3 KIT CYP19A1 CHD7 ESR1
ventricular septum development (GO:0003281)	50	13	2.02	+	6.44	0.00471	TGFBR2 FZD1 WNT5A CYR61 LTBP1 WNT11 SALL4 PITX2 LMO4 TBX3 SLIT3 BMPR2 SOX4
outflow tract morphogenesis (GO:0003151)	51	13	2.06	+	6.31	0.0057	SIX1 TGFBR2 FZD1 WNT5A SEMA3C BMPR1A WNT11 SEC24B PITX2 NPY1R TBX3 JUN BMPR2
development of primary female sexual characteristics (GO:0046545)	59	15	2.38	+	6.3	0.000849	DACH2 FSHB CYP19A1 FOXL2 PDGFRA FSHR WNT4 SLIT2 TGFB2 FSHR BCL2 SLIT3 KIT CYP19A1 ESR1
female gonad development (GO:0008585)	56	14	2.26	+	6.19	0.00265	FSHB CYP19A1 FOXL2 PDGFRA FSHR WNT4 SLIT2 TGFB2 FSHR BCL2 SLIT3 KIT CYP19A1 ESR1
cardiac septum morphogenesis (GO:0060411)	58	14	2.34	+	5.98	0.00381	TGFBR2 FZD1 WNT5A CYR61 SEMA3C BMPR1A WNT11 BMP5 PITX2 TBX3 SLIT3 BMPR2 SOX4 CHD7
roof of mouth development (GO:0060021)	66	14	2.66	+	5.25	0.0144	TGFBR2 EPHB2 FZD1 WNT5A SHH OSR2 BMPR1A WNT11 INSIG2 PDGFRA DLX6 TBX3 CHD7 SATB2
cardiac septum development (GO:0003279)	82	17	3.31	+	5.14	0.00159	TGFBR2 FZD1 WNT5A CYR61 SEMA3C BMPR1A LTBP1 WNT11 SALL4 BMP5 PITX2 LMO4 TBX3 SLIT3 BMPR2 SOX4 CHD7
cardiac ventricle development (GO:0003231)	91	18	3.67	+	4.9	0.00131
positive regulation of hormone secretion (GO:0046887)	71	14	2.87	+	4.88	0.0304
male sex differentiation (GO:0046661)	97	18	3.92	+	4.6	0.003
sex differentiation (GO:0007548)	161	28	6.5	+	4.31	7.42e-06
cell-cell junction organization (GO:0045216)	95	16	3.84	+	4.17	0.0391
reproductive structure development (GO:0048608)	179	29	7.23	+	4.01	1.59e-05
development of primary sexual characteristics (GO:0045137)	124	20	5.01	+	4	0.00506
regulation of animal organ morphogenesis (GO:2000027)	131	21	5.29	+	3.97	0.00295
reproductive system development (GO:0061458)	182	29	7.35	+	3.95	2.22e-05
gonad development (GO:0008406)	120	19	4.84	+	3.92	0.0122
cardiac chamber development (GO:0003205)	125	19	5.05	+	3.76	0.0208
appendage morphogenesis (GO:0035107)	133	20	5.37	+	3.72	0.0134
respiratory system development (GO:0060541)	142	21	5.73	+	3.66	0.00948
neuron projection guidance (GO:0097485)	177	26	7.15	+	3.64	0.000615
Wnt signaling pathway (GO:0016055)	151	22	6.1	+	3.61	0.0067
cell-cell signaling by wnt (GO:0198738)	152	22	6.14	+	3.59	0.00739
limb morphogenesis (GO:0035108)	132	19	5.33	+	3.57	0.0422
axon guidance (GO:0007411)	175	25	7.07	+	3.54	0.00174
cell fate commitment (GO:0045165)	176	25	7.11	+	3.52	0.00191
epithelial tube morphogenesis (GO:0060562)	208	29	8.4	+	3.45	0.000313
positive regulation of secretion by cell (GO:1903532)	188	26	7.59	+	3.43	0.00177
positive regulation of secretion (GO:0051047)	199	27	8.03	+	3.36	0.00148
appendage development (GO:0048736)	163	22	6.58	+	3.34	0.0208
blood vessel morphogenesis (GO:0048514)	266	35	10.74	+	3.26	4.94e-05
camera-type eye development (GO:0043010)	230	30	9.29	+	3.23	0.000692
mesenchyme development (GO:0060485)	184	24	7.43	+	3.23	0.0129
morphogenesis of an epithelium (GO:0002009)	292	38	11.79	+	3.22	1.48e-05
axonogenesis (GO:0007409)	256	33	10.34	+	3.19	0.000207
axon development (GO:0061564)	274	35	11.06	+	3.16	9.75e-05
blood vessel development (GO:0001568)	321	41	12.96	+	3.16	5.64e-06
heart morphogenesis (GO:0003007)	197	25	7.95	+	3.14	0.0124
angiogenesis (GO:0001525)	191	24	7.71	+	3.11	0.0231
eye development (GO:0001654)	263	33	10.62	+	3.11	0.000369
visual system development (GO:0150063)	263	33	10.62	+	3.11	0.000369
sensory system development (GO:0048880)	267	33	10.78	+	3.06	0.000509
chemotaxis (GO:0006935)	349	43	14.09	+	3.05	5.91e-06
regulation of epithelial cell proliferation (GO:0050678)	195	24	7.87	+	3.05	0.0319
taxis (GO:0042330)	350	43	14.13	+	3.04	6.4e-06
cell morphogenesis involved in neuron differentiation (GO:0048667)	312	38	12.6	+	3.02	7.54e-05
vasculature development (GO:0001944)	337	41	13.61	+	3.01	2.04e-05
cardiovascular system development (GO:0072358)	346	42	13.97	+	3.01	1.39e-05
negative regulation of cellular component movement (GO:0051271)	198	24	7.99	+	3	0.0403
tube morphogenesis (GO:0035239)	433	52	17.48	+	2.97	2.3e-07
embryonic organ morphogenesis (GO:0048562)	251	30	10.13	+	2.96	0.00376
positive regulation of cell adhesion (GO:0045785)	227	27	9.16	+	2.95	0.0149
tube development (GO:0035295)	579	68	23.38	+	2.91	4.92e-10
gland development (GO:0048732)	214	25	8.64	+	2.89	0.0466
urogenital system development (GO:0001655)	224	26	9.04	+	2.88	0.0342
regulation of cell growth (GO:0001558)	250	29	10.09	+	2.87	0.01
tissue morphogenesis (GO:0048729)	415	48	16.75	+	2.86	4.18e-06
embryonic organ development (GO:0048568)	303	35	12.23	+	2.86	0.000924
embryonic morphogenesis (GO:0048598)	442	51	17.84	+	2.86	1.3e-06
forebrain development (GO:0030900)	266	30	10.74	+	2.79	0.0112
neuron projection morphogenesis (GO:0048812)	339	38	13.69	+	2.78	0.000548
developmental process involved in reproduction (GO:0003006)	314	35	12.68	+	2.76	0.00201
sensory organ development (GO:0007423)	406	45	16.39	+	2.75	4.77e-05
plasma membrane bounded cell projection morphogenesis (GO:0120039)	343	38	13.85	+	2.74	0.000721
chordate embryonic development (GO:0043009)	280	31	11.3	+	2.74	0.0108
cell projection morphogenesis (GO:0048858)	344	38	13.89	+	2.74	0.000772
positive regulation of cell population proliferation (GO:0008284)	552	60	22.29	+	2.69	4.17e-07
head development (GO:0060322)	470	51	18.98	+	2.69	1.45e-05
cell part morphogenesis (GO:0032990)	360	39	14.53	+	2.68	0.000837
growth (GO:0040007)	268	29	10.82	+	2.68	0.0348
regulation of cell adhesion (GO:0030155)	408	44	16.47	+	2.67	0.000238
embryo development (GO:0009790)	574	61	23.17	+	2.63	4.96e-07
cellular response to lipid (GO:0071396)	273	29	11.02	+	2.63	0.0482
regulation of hormone levels (GO:0010817)	313	33	12.64	+	2.61	0.0199
response to lipid (GO:0033993)	399	42	16.11	+	2.61	0.000711
anatomical structure formation involved in morphogenesis (GO:0048646)	611	64	24.67	+	2.59	2.67e-07
cellular response to hormone stimulus (GO:0032870)	363	38	14.66	+	2.59	0.00338
embryo development ending in birth or egg hatching (GO:0009792)	298	31	12.03	+	2.58	0.0478
regulation of system process (GO:0044057)	298	31	12.03	+	2.58	0.0478
heart development (GO:0007507)	391	40	15.79	+	2.53	0.00249
circulatory system development (GO:0072359)	607	62	24.51	+	2.53	1.72e-06
positive regulation of cell differentiation (GO:0045597)	588	60	23.74	+	2.53	3.62e-06
brain development (GO:0007420)	437	44	17.64	+	2.49	0.000918
epithelium development (GO:0060429)	628	63	25.35	+	2.48	2.01e-06
regulation of growth (GO:0040008)	411	41	16.59	+	2.47	0.00477
negative regulation of cell population proliferation (GO:0008285)	392	39	15.83	+	2.46	0.00625
cell population proliferation (GO:0008283)	364	36	14.7	+	2.45	0.0187
response to hormone (GO:0009725)	449	44	18.13	+	2.43	0.00215
skeletal system development (GO:0001501)	378	37	15.26	+	2.42	0.0237
neuron projection development (GO:0031175)	486	47	19.62	+	2.4	0.00107
regulation of establishment of protein localization (GO:0070201)	373	36	15.06	+	2.39	0.039
neuron differentiation (GO:0030182)	743	71	30	+	2.37	1.18e-06
enzyme linked receptor protein signaling pathway (GO:0007167)	442	42	17.84	+	2.35	0.0075
neuron development (GO:0048666)	601	57	24.26	+	2.35	9.42e-05
cell morphogenesis involved in differentiation (GO:0000904)	402	38	16.23	+	2.34	0.0282
regulation of cell migration (GO:0030334)	533	50	21.52	+	2.32	0.00108
central nervous system development (GO:0007417)	587	55	23.7	+	2.32	0.000369
regulation of cellular component movement (GO:0051270)	609	57	24.59	+	2.32	0.000191
cell morphogenesis (GO:0000902)	524	49	21.16	+	2.32	0.00157
regulation of cell population proliferation (GO:0042127)	965	90	38.96	+	2.31	1.13e-08
positive regulation of developmental process (GO:0051094)	866	80	34.96	+	2.29	4.06e-07
cellular response to endogenous stimulus (GO:0071495)	699	64	28.22	+	2.27	5.11e-05
regulation of MAPK cascade (GO:0043408)	492	45	19.86	+	2.27	0.0083
animal organ morphogenesis (GO:0009887)	691	63	27.9	+	2.26	7.63e-05
regulation of cell motility (GO:2000145)	562	51	22.69	+	2.25	0.0022
positive regulation of transport (GO:0051050)	496	45	20.02	+	2.25	0.0145
negative regulation of multicellular organismal process (GO:0051241)	713	64	28.79	+	2.22	8.36e-05
regulation of locomotion (GO:0040012)	613	55	24.75	+	2.22	0.00125
anatomical structure morphogenesis (GO:0009653)	1506	135	60.8	+	2.22	1.73e-13
cell-cell signaling (GO:0007267)	547	49	22.08	+	2.22	0.00512
cellular response to oxygen-containing compound (GO:1901701)	515	46	20.79	+	2.21	0.013
cellular component morphogenesis (GO:0032989)	611	54	24.67	+	2.19	0.00217
locomotion (GO:0040011)	785	69	31.69	+	2.18	6.57e-05
cell development (GO:0048468)	1190	103	48.04	+	2.14	1.82e-08
positive regulation of multicellular organismal process (GO:0051240)	1043	90	42.11	+	2.14	6.89e-07
response to endogenous stimulus (GO:0009719)	789	68	31.85	+	2.13	0.000135
generation of neurons (GO:0048699)	1104	95	44.57	+	2.13	1.62e-07
positive regulation of transcription by RNA polymerase II (GO:0045944)	945	81	38.15	+	2.12	7.5e-06
tissue development (GO:0009888)	1113	95	44.93	+	2.11	3.11e-07
neurogenesis (GO:0022008)	1180	100	47.64	+	2.1	1.31e-07
regulation of cell differentiation (GO:0045595)	1136	96	45.86	+	2.09	3.09e-07
reproductive process (GO:0022414)	630	53	25.43	+	2.08	0.0104
reproduction (GO:0000003)	633	53	25.56	+	2.07	0.0164
negative regulation of developmental process (GO:0051093)	600	50	24.22	+	2.06	0.0271
nervous system development (GO:0007399)	1551	128	62.62	+	2.04	5.72e-10
regulation of multicellular organismal development (GO:2000026)	1302	107	52.56	+	2.04	9.57e-08
response to oxygen-containing compound (GO:1901700)	737	60	29.75	+	2.02	0.00819
positive regulation of phosphorylation (GO:0042327)	677	54	27.33	+	1.98	0.0373
positive regulation of transcription, DNA-templated (GO:0045893)	1193	95	48.16	+	1.97	9.16e-06
positive regulation of gene expression (GO:0010628)	1460	116	58.94	+	1.97	9.34e-08
response to external stimulus (GO:0009605)	1086	86	43.84	+	1.96	8.15e-05
positive regulation of RNA biosynthetic process (GO:1902680)	1251	99	50.51	+	1.96	5.23e-06
positive regulation of nucleic acid-templated transcription (GO:1903508)	1251	99	50.51	+	1.96	5.23e-06
movement of cell or subcellular component (GO:0006928)	948	75	38.27	+	1.96	0.000733
regulation of developmental process (GO:0050793)	1670	132	67.42	+	1.96	3.83e-09
positive regulation of macromolecule biosynthetic process (GO:0010557)	1405	110	56.72	+	1.94	7.56e-07
regulation of multicellular organismal process (GO:0051239)	1932	151	78	+	1.94	1.18e-10
cellular response to organic substance (GO:0071310)	1258	98	50.79	+	1.93	1.46e-05
positive regulation of nucleobase-containing compound metabolic process (GO:0045935)	1429	111	57.69	+	1.92	1.01e-06
positive regulation of RNA metabolic process (GO:0051254)	1304	101	52.65	+	1.92	1.1e-05
animal organ development (GO:0048513)	1938	150	78.24	+	1.92	3.27e-10
positive regulation of biosynthetic process (GO:0009891)	1466	113	59.19	+	1.91	1.05e-06
positive regulation of cell communication (GO:0010647)	1064	82	42.96	+	1.91	0.000586
negative regulation of cell communication (GO:0010648)	833	64	33.63	+	1.9	0.0209
multicellular organism development (GO:0007275)	3077	236	124.23	+	1.9	1.04e-18
regulation of cell death (GO:0010941)	939	72	37.91	+	1.9	0.00402
positive regulation of signaling (GO:0023056)	1070	82	43.2	+	1.9	0.000646
negative regulation of signaling (GO:0023057)	836	64	33.75	+	1.9	0.0217
negative regulation of response to stimulus (GO:0048585)	1008	77	40.7	+	1.89	0.00174
regulation of phosphorylation (GO:0042325)	1037	79	41.87	+	1.89	0.00155
positive regulation of cellular biosynthetic process (GO:0031328)	1450	110	58.54	+	1.88	4.99e-06
negative regulation of biosynthetic process (GO:0009890)	1085	82	43.8	+	1.87	0.00119
regulation of transcription by RNA polymerase II (GO:0006357)	1579	119	63.75	+	1.87	1.16e-06
negative regulation of cellular biosynthetic process (GO:0031327)	1076	81	43.44	+	1.86	0.00165
cellular response to chemical stimulus (GO:0070887)	1598	120	64.52	+	1.86	1.41e-06
positive regulation of signal transduction (GO:0009967)	961	72	38.8	+	1.86	0.00851
negative regulation of macromolecule biosynthetic process (GO:0010558)	1042	78	42.07	+	1.85	0.00386
regulation of localization (GO:0032879)	1707	127	68.92	+	1.84	5.84e-07
anatomical structure development (GO:0048856)	3391	251	136.9	+	1.83	2.41e-18
regulation of phosphate metabolic process (GO:0019220)	1165	86	47.03	+	1.83	0.00136
regulation of phosphorus metabolic process (GO:0051174)	1166	86	47.07	+	1.83	0.00139
developmental process (GO:0032502)	3583	264	144.65	+	1.83	2.44e-19
system development (GO:0048731)	2810	207	113.45	+	1.82	1.19e-13
regulation of protein phosphorylation (GO:0001932)	953	70	38.47	+	1.82	0.0257
negative regulation of cellular metabolic process (GO:0031324)	1744	127	70.41	+	1.8	2.06e-06
cell surface receptor signaling pathway (GO:0007166)	1351	98	54.54	+	1.8	0.000389
negative regulation of nucleobase-containing compound metabolic process (GO:0045934)	1054	76	42.55	+	1.79	0.0223
negative regulation of cellular macromolecule biosynthetic process (GO:2000113)	999	72	40.33	+	1.79	0.041
response to organic substance (GO:0010033)	1558	111	62.9	+	1.76	0.000128
cellular developmental process (GO:0048869)	2442	172	98.59	+	1.74	6.63e-09
response to chemical (GO:0042221)	2408	169	97.22	+	1.74	1.58e-08
negative regulation of metabolic process (GO:0009892)	1913	133	77.23	+	1.72	1.5e-05
positive regulation of macromolecule metabolic process (GO:0010604)	2348	163	94.79	+	1.72	9.95e-08
negative regulation of nitrogen compound metabolic process (GO:0051172)	1643	114	66.33	+	1.72	0.000277
positive regulation of response to stimulus (GO:0048584)	1326	92	53.53	+	1.72	0.00668
regulation of cellular component organization (GO:0051128)	1649	114	66.57	+	1.71	0.000301
negative regulation of macromolecule metabolic process (GO:0010605)	1767	122	71.34	+	1.71	9.15e-05
regulation of nucleobase-containing compound metabolic process (GO:0019219)	2782	191	112.32	+	1.7	2.28e-09
cell differentiation (GO:0030154)	2360	162	95.28	+	1.7	3.3e-07
regulation of nucleic acid-templated transcription (GO:1903506)	2404	165	97.06	+	1.7	2.22e-07
regulation of RNA biosynthetic process (GO:2001141)	2405	165	97.1	+	1.7	2.23e-07
regulation of transcription, DNA-templated (GO:0006355)	2365	162	95.48	+	1.7	3.48e-07
positive regulation of nitrogen compound metabolic process (GO:0051173)	2252	154	90.92	+	1.69	1.34e-06
negative regulation of cellular process (GO:0048523)	3149	215	127.13	+	1.69	5.63e-11
regulation of signal transduction (GO:0009966)	2050	139	82.76	+	1.68	2.24e-05
regulation of macromolecule biosynthetic process (GO:0010556)	2738	185	110.54	+	1.67	2.37e-08
positive regulation of metabolic process (GO:0009893)	2518	169	101.66	+	1.66	5.37e-07
positive regulation of cellular metabolic process (GO:0031325)	2328	156	93.99	+	1.66	4.83e-06
regulation of RNA metabolic process (GO:0051252)	2584	173	104.32	+	1.66	4.14e-07
regulation of cellular macromolecule biosynthetic process (GO:2000112)	2665	178	107.59	+	1.65	1.82e-07
regulation of biosynthetic process (GO:0009889)	2845	190	114.86	+	1.65	3.41e-08
multicellular organismal process (GO:0032501)	4128	273	166.66	+	1.64	6.67e-14
regulation of cellular biosynthetic process (GO:0031326)	2814	186	113.61	+	1.64	1.67e-07
regulation of cell communication (GO:0010646)	2300	152	92.86	+	1.64	1.69e-05
regulation of gene expression (GO:0010468)	2973	196	120.03	+	1.63	4e-08
negative regulation of biological process (GO:0048519)	3467	228	139.97	+	1.63	3.5e-10
regulation of signaling (GO:0023051)	2315	152	93.46	+	1.63	2.62e-05
positive regulation of cellular process (GO:0048522)	3606	234	145.58	+	1.61	5.78e-10
regulation of molecular function (GO:0065009)	2224	144	89.79	+	1.6	0.000204
regulation of biological quality (GO:0065008)	2715	175	109.61	+	1.6	5.48e-06
regulation of response to stimulus (GO:0048583)	2640	168	106.58	+	1.58	2.65e-05
regulation of primary metabolic process (GO:0080090)	4125	261	166.54	+	1.57	1.51e-10
regulation of macromolecule metabolic process (GO:0060255)	4192	265	169.24	+	1.57	7.65e-11
positive regulation of biological process (GO:0048518)	4070	257	164.32	+	1.56	3.24e-10
regulation of cellular metabolic process (GO:0031323)	4221	265	170.41	+	1.56	1.77e-10
regulation of nitrogen compound metabolic process (GO:0051171)	4035	252	162.9	+	1.55	2.13e-09
regulation of metabolic process (GO:0019222)	4508	278	182	+	1.53	2.43e-10
cellular response to stimulus (GO:0051716)	4338	255	175.14	+	1.46	8.2e-07
signal transduction (GO:0007165)	3124	183	126.12	+	1.45	0.00173
signaling (GO:0023052)	3349	196	135.21	+	1.45	0.000585
response to stimulus (GO:0050896)	5259	307	212.32	+	1.45	4.04e-09
cell communication (GO:0007154)	3444	200	139.04	+	1.44	0.000631
regulation of cellular process (GO:0050794)	7750	445	312.89	+	1.42	4.91e-17
regulation of biological process (GO:0050789)	8257	465	333.35	+	1.39	1e-16
biological regulation (GO:0065007)	8962	487	361.82	+	1.35	5.66e-15
cellular component organization or biogenesis (GO:0071840)	4239	226	171.14	+	1.32	0.0451
cellular process (GO:0009987)	11116	534	448.78	+	1.19	4.48e-06
biological_process (GO:0008150)	14320	673	578.13	+	1.16	1.03e-12
Unclassified (UNCLASSIFIED)	4802	99	193.87	-	0.51	0

## Sheet: Molecular Function
Analysis Type:	PANTHER Overrepresentation Test (Released 20181113)
Annotation Version and Release Date:	GO Ontology database Released 2018-12-01
Analyzed List:	upload_1 (Gallus gallus)
Reference List:	Gallus gallus (all genes in database)
Test Type:	FISHER
Correction:	BONFERRONI
Bonferroni count:	2202
GO molecular function complete	Gallus gallus - REFLIST (19122)	Gene Number in Uploaded List	Expected value	upload_1 (over/under)	Fold Enrichment	P-value	Genes in Uploaded List (Only show top 30)
transmembrane-ephrin receptor activity (GO:0005005)	19	8	0.77	+	10.43	0.0126	EPHA4 EPHB2 EPHA3 EPHB2 EPHA4 EPHA3 EPHA7 EPHB6
transmembrane receptor protein kinase activity (GO:0019199)	91	18	3.67	+	4.9	0.000436	EPHA4 TGFBR2 ACVR2A EPHB2 RET BMPR1A EPHA3 EPHB2 EPHA3 EPHA4 PDGFRA FGFR3 KIT BMPR2 FGFR3 EPHA7 PDGFRA EPHB6
transmembrane receptor protein tyrosine kinase activity (GO:0004714)	76	14	3.07	+	4.56	0.0201	EPHA4 EPHB2 RET EPHA3 EPHB2 EPHA3 EPHA4 PDGFRA FGFR3 KIT FGFR3 EPHA7 PDGFRA EPHB6
heparin binding (GO:0008201)	93	15	3.75	+	4	0.0399	RSPO2 PDCD5 THBS2 CYR61 WISP1 POSTN LRPAP1 APOB SERPINE2 RPL22 SLIT2 MARCO PTN PTN APOB
glycosaminoglycan binding (GO:0005539)	131	18	5.29	+	3.4	0.0431	TGFBR2 RSPO2 DCN PDCD5 SHH THBS2 CYR61 WISP1 POSTN LRPAP1 APOB SERPINE2 RPL22 SLIT2 MARCO PTN PTN APOB
receptor ligand activity (GO:0048018)	331	34	13.36	+	2.54	0.00631	MLN FGF14 WNT7B FGF13 WNT9A ADCYAP1 WNT5A FSHB SEMA3D INHBB GCG SEMA3C VIP IGF1 CXCL12 SEMA3C WNT11 HGF SEMA3E PRL BMP5 TGFB2 MLN WNT4 TGFB2 SMS PTN FGF7 PTN PDGFD
receptor regulator activity (GO:0030545)	355	35	14.33	+	2.44	0.0091	MLN FGF14 WNT7B FGF13 WNT9A ADCYAP1 WNT5A FSHB SEMA3D INHBB GCG SEMA3C VIP IGF1 CXCL12 LRPAP1 SEMA3C WNT11 HGF SEMA3E PRL BMP5 TGFB2 MLN WNT4 TGFB2 SMS PTN FGF7 PTN
transcription factor binding (GO:0008134)	515	49	20.79	+	2.36	0.000378	RCOR3 NFKB1 POU1F1 UBE2I PITX2 NR0B1 GTF2A1 MED30 HDAC2 CENPF CNOT7 SIX2 HDAC2 RPS3 HMGA1 PER2 USP7 ATG7 EPAS1 PSMC1 T FOXO1 USP7 NEUROD1 SALL4 HDAC9 FOXL2 RCOR3 TCF7L2 MYOCD
DNA-binding transcription factor activity, RNA polymerase II-specific (GO:0000981)	516	49	20.83	+	2.35	0.00039	SIX1 NFKB1 POU1F1 NR0B1 SOX14 ELF1 SIX2 POU1F1 HIF1A HIF1A OSR2 EPAS1 T FOXO1 BMPR1A SP3 ARNTL2 NEUROD1 PAX9 BARX1 CEBPZ SOX11 SP5 NR2E1 MEIS1 KLF7 OTX2 FOXL2 OLIG2 MYOCD
RNA polymerase II proximal promoter sequence-specific DNA binding (GO:0000978)	453	40	18.29	+	2.19	0.0307	SIX1 PITX2 ELF1 SIX2 NEUROG1 ZNF277 DMTF1 ARNTL2 T SP3 ARNTL2 NEUROD1 BCL11A CEBPZ MEIS1 KLF7 OTX2 FOXL2 TCF7L2 MYOCD DLX6 MAF ZBTB17 XBP1 TBX3 MYOD1 JUN JUN NKX6-2 HSF2
proximal promoter sequence-specific DNA binding (GO:0000987)	461	40	18.61	+	2.15	0.0381
DNA-binding transcription factor activity (GO:0003700)	833	70	33.63	+	2.08	9.66e-05
RNA polymerase II regulatory region sequence-specific DNA binding (GO:0000977)	666	55	26.89	+	2.05	0.00385
RNA polymerase II regulatory region DNA binding (GO:0001012)	672	55	27.13	+	2.03	0.00652
signaling receptor binding (GO:0005102)	1069	87	43.16	+	2.02	5.31e-06
transcription regulatory region sequence-specific DNA binding (GO:0000976)	713	58	28.79	+	2.01	0.00316
sequence-specific DNA binding (GO:0043565)	1034	82	41.75	+	1.96	5.25e-05
transcription regulator activity (GO:0140110)	1140	90	46.02	+	1.96	1.47e-05
transcription regulatory region DNA binding (GO:0044212)	811	64	32.74	+	1.95	0.00225
regulatory region nucleic acid binding (GO:0001067)	812	64	32.78	+	1.95	0.00231
sequence-specific double-stranded DNA binding (GO:1990837)	743	58	30	+	1.93	0.0122
protein dimerization activity (GO:0046983)	898	70	36.25	+	1.93	0.00117
DNA binding (GO:0003677)	1693	130	68.35	+	1.9	1.23e-08
double-stranded DNA binding (GO:0003690)	810	61	32.7	+	1.87	0.0191
identical protein binding (GO:0042802)	1122	77	45.3	+	1.7	0.0294
nucleic acid binding (GO:0003676)	2810	179	113.45	+	1.58	2.29e-06
protein binding (GO:0005515)	5249	333	211.91	+	1.57	1.65e-16
heterocyclic compound binding (GO:1901363)	4625	258	186.72	+	1.38	3.49e-05
organic cyclic compound binding (GO:0097159)	4684	260	189.1	+	1.37	5.1e-05
binding (GO:0005488)	9919	538	400.45	+	1.34	1.73e-19
molecular_function (GO:0003674)	13507	645	545.31	+	1.18	7.4e-13
Unclassified (UNCLASSIFIED)	5615	127	226.69	-	0.56	0

## Sheet: Cellular Component
Analysis Type:	PANTHER Overrepresentation Test (Released 20181113)
Annotation Version and Release Date:	GO Ontology database Released 2018-12-01
Analyzed List:	upload_1 (Gallus gallus)
Reference List:	Gallus gallus (all genes in database)
Test Type:	FISHER
Correction:	BONFERRONI
Bonferroni count:	1171
GO cellular component complete	Gallus gallus - REFLIST (19122)	Gene Number in Uploaded List	Expected value	upload_1 (over/under)	Fold Enrichment	P-value	Genes in Uploaded List (Only show top 30)
transcription factor complex (GO:0005667)	342	33	13.81	+	2.39	0.0191	RCOR3 SIX1 POU1F1 GTF2A1 DACH2 SOX14 SIX2 TAF3 MXI1 SUPT3H TAF3 ARNTL2 EPAS1 ARNTL2 NEUROD1 SOX11 MEIS1 RCOR3 TCF7L2 PITX2 LMO4 MYOD1 JUN JUN MED6 TAF13 TFAP2D HDAC9 ATF7IP TEAD1
extracellular region (GO:0005576)	1437	108	58.02	+	1.86	1.89e-06	AGA THBS2 COL22A1 TGFBR2 MLN HABP2 FGF14 RSPO2 STX2 OLFM4 WNT7B ASAH1 AQP2 FGF13 TBC1D15 WNT9A FRZB DCN CHID1 PLAU WNT9A TOLLIP WNT5A SHH THBS2 FSHB CYR61 TWSG1 SEMA3D ENTPD2
extracellular region part (GO:0044421)	1166	84	47.07	+	1.78	0.000843	AGA THBS2 COL22A1 TGFBR2 HABP2 STX2 OLFM4 WNT7B ASAH1 AQP2 WNT9A FRZB CHID1 PLAU TOLLIP WNT5A SHH THBS2 FSHB CYR61 TWSG1 SEMA3D ENTPD2 INHBB CPZ GCG WISP1 EGFL6 SEMA3C IGF1
extracellular space (GO:0005615)	983	70	39.69	+	1.76	0.0134	AGA COL22A1 HABP2 STX2 OLFM4 WNT7B ASAH1 AQP2 WNT9A FRZB CHID1 PLAU TOLLIP WNT5A SHH FSHB TWSG1 SEMA3D INHBB CPZ GCG SEMA3C IGF1 DLK1 POSTN APOB COLEC11 SEMA3C WNT11 HGF
nuclear lumen (GO:0031981)	2678	157	108.12	+	1.45	0.00315	THOC7 INTS9 FAS TXNRD3 HACE1 SIX1 TMEM70 NFKB1 NRXN1 CWC15 CHRND POT1 SUPT20H UBE2I RMI2 PSMC1 POT1 DIEXF NR0B1 GTF2A1 MED30 ZNF622 HDAC2 CENPF CNOT7 PLCZ1 NOC4L PIK3CB COMMD8 ZFP64
organelle lumen (GO:0043233)	2963	171	119.62	+	1.43	0.00233	THOC7 INTS9 FAS TXNRD3 HACE1 SIX1 TMEM70 NFKB1 NRXN1 CWC15 CHRND POT1 SUPT20H UBE2I RMI2 PSMC1 POT1 DIEXF NR0B1 GTF2A1 MED30 ZNF622 HDAC2 CENPF CNOT7 PLCZ1 NOC4L PIK3CB COMMD8 ZFP64
intracellular organelle lumen (GO:0070013)	2963	171	119.62	+	1.43	0.00233	THOC7 INTS9 FAS TXNRD3 HACE1 SIX1 TMEM70 NFKB1 NRXN1 CWC15 CHRND POT1 SUPT20H UBE2I RMI2 PSMC1 POT1 DIEXF NR0B1 GTF2A1 MED30 ZNF622 HDAC2 CENPF CNOT7 PLCZ1 NOC4L PIK3CB COMMD8 ZFP64
membrane-enclosed lumen (GO:0031974)	2963	171	119.62	+	1.43	0.00233	THOC7 INTS9 FAS TXNRD3 HACE1 SIX1 TMEM70 NFKB1 NRXN1 CWC15 CHRND POT1 SUPT20H UBE2I RMI2 PSMC1 POT1 DIEXF NR0B1 GTF2A1 MED30 ZNF622 HDAC2 CENPF CNOT7 PLCZ1 NOC4L PIK3CB COMMD8 ZFP64
nucleus (GO:0005634)	5190	294	209.53	+	1.4	1.4e-07	THOC7 PRKAB1 INTS9 ATF7IP FAS TXNRD3 BASP1 RCOR3 HACE1 SIX1 TMEM70 ZNF622 NFKB1 NRXN1 CWC15 TSNAX CHRND POT1 SUPT20H PBK POU1F1 UBE2I PTPN11 RMI2 RALGAPA1 NGLY1 PSMC1 POT1 DIEXF PITX2
nuclear part (GO:0044428)	3129	173	126.33	+	1.37	0.0244	THOC7 INTS9 FAS TXNRD3 HACE1 SIX1 TMEM70 NFKB1 NRXN1 CWC15 CHRND POT1 SUPT20H UBE2I RMI2 PSMC1 POT1 DIEXF NR0B1 GTF2A1 MED30 ZNF622 HDAC2 LBR CENPF CNOT7 SOX14 PLCZ1 NOC4L PIK3CB
protein-containing complex (GO:0032991)	4382	241	176.91	+	1.36	0.000249
intracellular membrane-bounded organelle (GO:0043231)	7652	401	308.93	+	1.3	7.48e-08
membrane-bounded organelle (GO:0043227)	8130	426	328.23	+	1.3	5.13e-09
intracellular organelle (GO:0043229)	9212	457	371.91	+	1.23	2.24e-06
organelle (GO:0043226)	9454	466	381.68	+	1.22	2.88e-06
cell part (GO:0044464)	12479	611	503.81	+	1.21	1.67e-13
cell (GO:0005623)	12602	616	508.77	+	1.21	1.18e-13
intracellular (GO:0005622)	10680	517	431.18	+	1.2	8.31e-07
intracellular part (GO:0044424)	10680	517	431.18	+	1.2	8.31e-07
cytoplasm (GO:0005737)	7525	364	303.8	+	1.2	0.0214
cellular_component (GO:0005575)	14926	704	602.6	+	1.17	2.1e-18
Unclassified (UNCLASSIFIED)	4196	68	169.4	-	0.4	0
